# Supplementary material
Source: PubMed Central journal article supplement (PMC1177395)
Supplement: pnas_0504248102_1.pdf [file pnas_0504248102_1.pdf]

A.

| Sheep       | Latency before lymphocytosis (days) | Latency before death (days) | Duration of the lymphocytotic phase (days) |
|-------------|-------------------------------------|-----------------------------|--------------------------------------------|
| 1           | 420                                 | 448                         | 28                                         |
| 2           | 994                                 | 1016                        | 22                                         |
| 3           | 594                                 | 604                         | 10                                         |
| 4           | 425                                 | 600                         | 175                                        |
| 5           | 425                                 | 702                         | 277                                        |
| 6           | 306                                 | 691                         | 385                                        |
| 7           | 952                                 | 1095                        | 143                                        |
| 8           | 1028                                | 1208                        | 180                                        |
| 9           | 810                                 | 908                         | 98                                         |
| 10          | 747                                 | 802                         | 55                                         |
| <b>mean</b> | <b>670</b>                          | <b>807</b>                  | <b>137</b>                                 |

B.

| Sheep       | Duration of the acute phase (days) |
|-------------|------------------------------------|
| 11          | 50                                 |
| 12          | 48                                 |
| 13          | 119                                |
| 14          | 23                                 |
| 15          | 46                                 |
| 16          | 103                                |
| 17          | 1                                  |
| 18          | 5                                  |
| 19          | 54                                 |
| 20          | 14                                 |
| <b>mean</b> | <b>46</b>                          |

C.

| Sheep | Time elapsed before detectable lymphoma / lymphosarcoma (days) | Time elapsed before death (days) | Duration of the acute phase (days) |
|-------|----------------------------------------------------------------|----------------------------------|------------------------------------|
| 21    | 1324                                                           | 1353                             | 29                                 |
| 22    | 1600                                                           | 1613                             | 13                                 |
| 23    | 1425                                                           | 1425                             | -                                  |
| 24    | 891                                                            | 891                              | -                                  |
| 25    | 1160                                                           | 1160                             | -                                  |
| 26    | 1289                                                           | 1289                             | -                                  |
| 27    | 500                                                            | 510                              | 10                                 |
