# Supplementary material
Source: PubMed Central journal article supplement (PMC1177395)

## % of apoptotic B lymphocytes

**Control sheep**

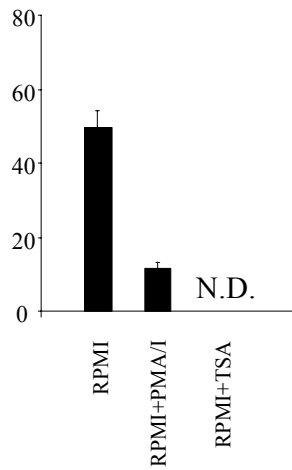

**Infected sheep**

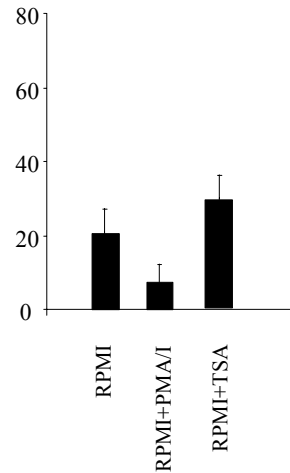

## Net viral p24 expression in supernatant

**Control sheep**

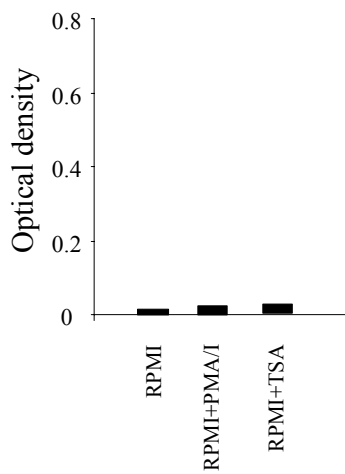

**Infected sheep**

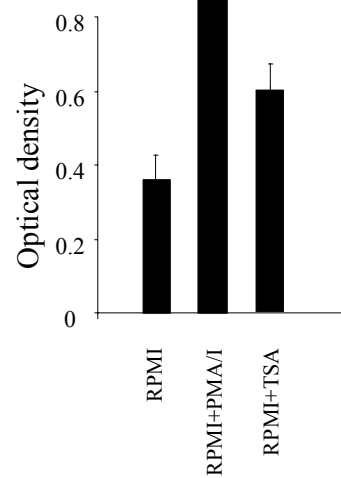

Supplement: pnas_0504248102_3.pdf [file pnas_0504248102_3.pdf]
