# Supplementary material
Source: PubMed Central journal article supplement (PMC1177395)

A.

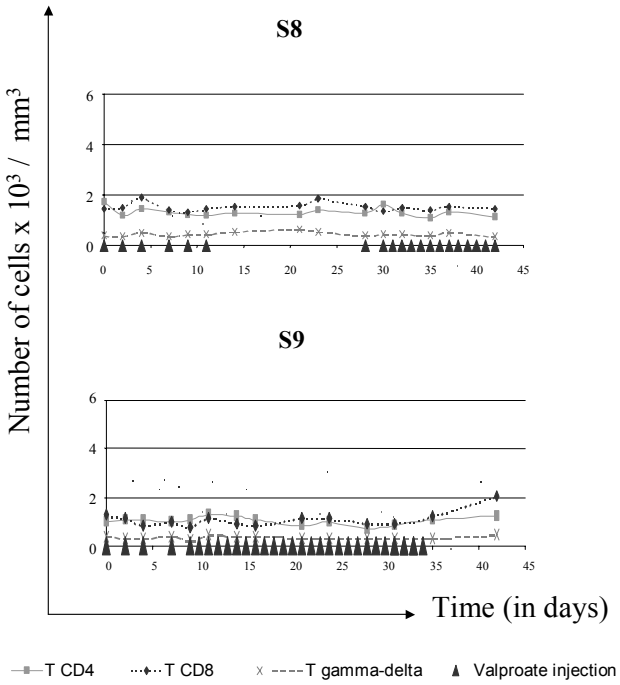

B.

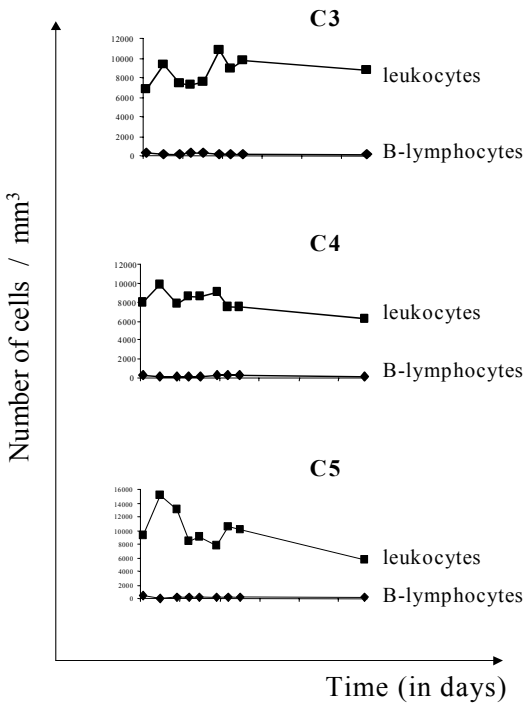

Supplement: pnas_0504248102_2.pdf [file pnas_0504248102_2.pdf]
